CORRECTION

# Correction: Dominant-Negative Effect of a Missense Variant in the TASK-2 (*KCNK5*) K<sup>+</sup> Channel Associated with Balkan Endemic Nephropathy

Alan P. Reed, Giovanna Bucci, Firdaus Abd-Wahab, Stephen J. Tucker

Several labels are missing from Figs 1 and 5 images. Please see the corrected Figs [1](#) and [5](#) here.

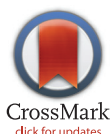

## OPEN ACCESS

**Citation:** Reed AP, Bucci G, Abd-Wahab F, Tucker SJ (2016) Correction: Dominant-Negative Effect of a Missense Variant in the TASK-2 (*KCNK5*) K<sup>+</sup> Channel Associated with Balkan Endemic Nephropathy. PLoS ONE 11(7): e0160114. doi:10.1371/journal.pone.0160114

**Published:** July 21, 2016

**Copyright:** © 2016 Reed et al. This is an open access article distributed under the terms of the [Creative Commons Attribution License](#), which permits unrestricted use, distribution, and reproduction in any medium, provided the original author and source are credited.

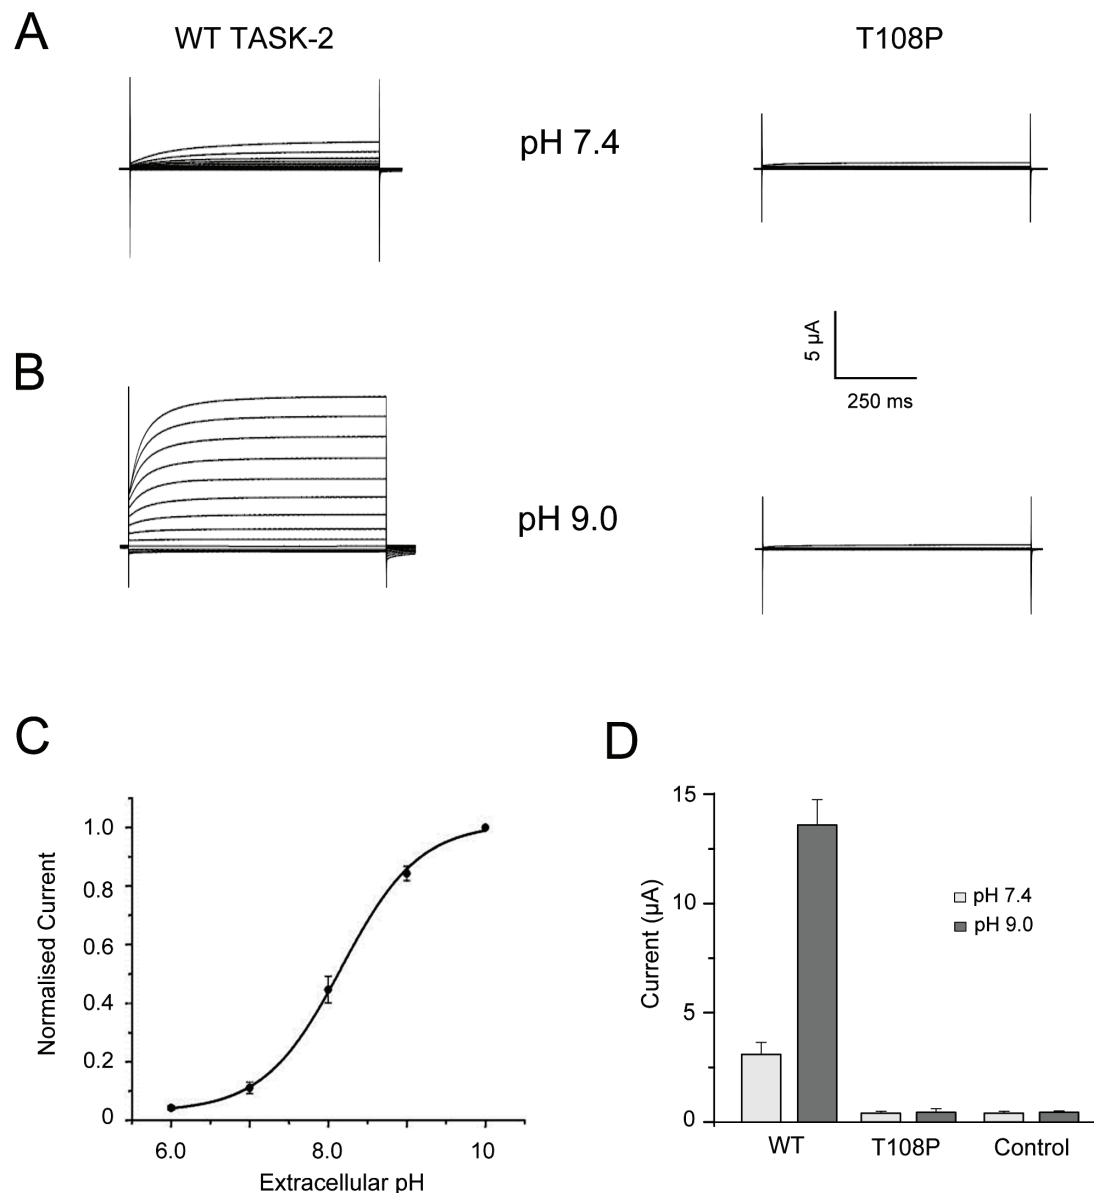

**Fig 1. T108P variant in TASK-2 causes a loss of function.** (A) Representative whole-cell current traces at physiological extracellular pH 7.4 recorded from oocytes injected with equivalent amounts of mRNA for either WT TASK-2 or the T108P variant. Currents were recorded using 300 ms voltage steps from a holding potential of -80 mV delivered in 20 mV increments between -140 mV and +100 mV. (B) Similar currents recorded after extracellular. (C) Activation of WT TASK-2 currents at alkaline pH. Results shown as means  $\pm$  s.e.m. (D) Averaged whole-cell currents from uninjected control oocytes and cells expressing either WT or T108P TASK-2 channels at the indicated external pH values (WT vs T108P,  $P < 0.01$  at pH 7.4 and pH 9, one-way ANOVA, *post-hoc* Tukey HSD test;  $n = 9$  for all conditions).

doi:10.1371/journal.pone.0160114.g001

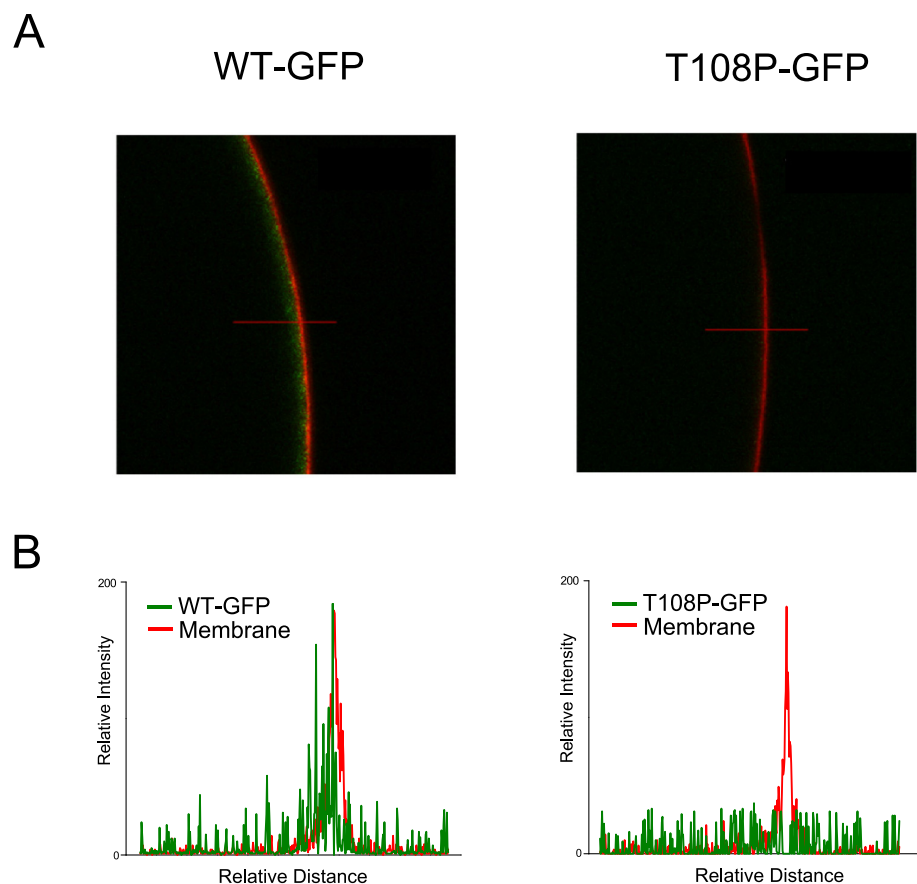

**Fig 5. T108P reduces trafficking to the cell membrane.** Confocal microscopy of GFP-tagged WT and mutant TASK-2 channels. (A) WT TASK-2 and T108P tagged with GFP at the C-termini expressed in oocytes. The red fluorescent signal (Wheat Germ Agglutinin CF633) indicates the location of the cell membrane. WT channels tagged with GFP (green) exhibit a clear membrane-associated fluorescence, whereas the mutant T108P channels showed no membrane localization, and no GFP fluorescence in any other part of the oocyte. (B) Representative relative signal-intensity profiles for oocytes expressing WT or T108P mutant channels. Intensities were determined along the cross-sections indicated by the red lines in panel A.

doi:10.1371/journal.pone.0160114.g002

## Reference

1. Reed AP, Bucci G, Abd-Wahab F, Tucker SJ (2016) Dominant-Negative Effect of a Missense Variant in the TASK-2 (*KCNK5*)  $K^+$  Channel Associated with Balkan Endemic Nephropathy. PLoS ONE 11(5): e0156456. doi: [10.1371/journal.pone.0156456](https://doi.org/10.1371/journal.pone.0156456) PMID: [27228168](https://pubmed.ncbi.nlm.nih.gov/27228168/)
